# Supplementary material
Source: PubMed Central journal article supplement (PMC2958056)
Supplement: NIHMS228065-supplement-Supp_Table_s1.pdf [file NIHMS228065-supplement-Supp_Table_s1.pdf]

TableS1. Complete Benchmark 4.0

| Complex                 | Cat. | PDB ID 1 | Protein 1                            | PDB ID 2  | Protein 2                      | I-RMSD (Å) | $\Delta$ ASA(Å <sup>2</sup> ) | BM version <sup>a</sup> |
|-------------------------|------|----------|--------------------------------------|-----------|--------------------------------|------------|-------------------------------|-------------------------|
| <b>Rigid-body (121)</b> |      |          |                                      |           |                                |            |                               |                         |
| 1AHW_AB:C               | A    | 1FGN_LH  | Fab 5g9                              | 1TFH_A    | Tissue factor                  | 0.69       | 1899                          | 2                       |
| 1BVK_DE:F               | A    | 1BVL_BA  | Fv Hulys11                           | 3LZT_     | HEW lysozyme                   | 1.24       | 1321                          | 2                       |
| 1DQJ_AB:C               | A    | 1DQQ_CD  | Fab Hyhel63                          | 3LZT_     | HEW lysozyme                   | 0.75       | 1765                          | 2                       |
| 1E6J_HL:P               | A    | 1E6O_HL  | Fab                                  | 1A43_     | HIV-1 capsid protein p24       | 1.05       | 1245                          | 2                       |
| 1JPS_HL:T               | A    | 1JPT_HL  | Fab D3H44                            | 1TFH_B    | Tissue factor                  | 0.51       | 1852                          | 2                       |
| 1MLC_AB:E               | A    | 1MLB_AB  | Fab44.1                              | 3LZT_     | HEW lysozyme                   | 0.6        | 1392                          | 2                       |
| 1VFB_AB:C               | A    | 1VFA_AB  | Fv D1.3                              | 8LYZ_     | HEW lysozyme                   | 1.02       | 1383                          | 2                       |
| 1WEJ_HL:F               | A    | 1QBL_HL  | Fab E8                               | 1HRC_     | Cytochrome C                   | 0.31       | 1177                          | 2                       |
| 2FD6_HL:U               | A    | 2FAT_HL  | Plasminogen receptor antibody        | 1YWH_A    | Plasminogen activator receptor | 1.07       | 1139                          | 3                       |
| 2I25_N:L                | A    | 2I24_N   | Shark single domain antigen receptor | 3LZT      | Lysozyme                       | 1.21       | 1425                          | 3                       |
| 2VIS_AB:C               | A    | 1GIG_LH  | Fab                                  | 2VIU_ ACE | Flu virus hemagglutinin        | 0.8        | 1296                          | 2                       |
| 1BJ1_HL:VW              | AB   | 1BJ1_HL  | Fab                                  | 2VPF_GH   | VEGF                           | 0.5        | 1731                          | 2                       |
| 1FSK_BC:A               | AB   | 1FSK_BC  | Fab                                  | 1BV1_     | Birch pollen antigen Bet V1    | 0.45       | 1623                          | 2                       |
| 1I9R_HL:ABC             | AB   | 1I9R_HL  | Fab                                  | 1ALY_ABC  | Cd40 ligand                    | 1.3        | 1498                          | 2                       |
| 1IQD_AB:C               | AB   | 1IQD_AB  | Fab                                  | 1D7P_M    | Factor VIII domain C2          | 0.48       | 1976                          | 2                       |
| 1K4C_AB:C               | AB   | 1K4C_AB  | Fab                                  | 1JVM_ABCD | Potassium Channel Kcsa         | 0.53       | 1601                          | 2                       |
| 1KXQ_H:A                | AB   | 1KXQ_H   | Camel VHH                            | 1PPI_     | Pancreatic alpha-amylase       | 0.72       | 2172                          | 2                       |
| 1NCA_HL:N               | AB   | 1NCA_HL  | Fab                                  | 7NN9_     | Flu virus neuraminidase N9     | 0.24       | 1953                          | 2                       |
| 1NSN_HL:S               | AB   | 1NSN_HL  | Fab N10                              | 1KDC_     | Staphylococcal nuclease        | 0.35       | 1776                          | 2                       |
| 1QFW_HL:AB              | AB   | 1QFW_HL  | Fv                                   | 1HRP_AB   | Human chorionic gonadotropin   | 1.31       | 1580                          | 2                       |
| 1QFW_IM:AB              | AB   | 1QFW_IM  | Fv                                   | 1HRP_AB   | Human chorionic gonadotropin   | 0.73       | 1637                          | 2                       |
| 2JEL_HL:P               | AB   | 2JEL_HL  | Fab Jel42                            | 1POH_     | HPr                            | 0.17       | 1501                          | 2                       |
| 1AVX_A:B                | E    | 1QQU_A   | Porcine trypsin                      | 1BA7_B    | Soybean trypsin inhibitor      | 0.47       | 1585                          | 2                       |
| 1AY7_A:B                | E    | 1RGH_B   | Barnase                              | 1A19_B    | Barstar                        | 0.54       | 1237                          | 2                       |
| 1BVN_P:T                | E    | 1PIG_    | $\alpha$ -amylase                    | 1HOE_     | Tendamistat                    | 0.87       | 2222                          | 2                       |
| 1CGI_E:I                | E    | 2CGA_B   | Bovine chymotrypsinogen              | 1HPT_     | PSTI                           | 2.02       | 2053                          | 2                       |
| 1CLV_A:I                | E    | 1JAE_A   | $\alpha$ -amylase                    | 1QFD_A(1) | $\alpha$ -amylase inhibitor    | 0.86       | 2087                          | 4                       |
| 1D6R_A:I                | E    | 2TGT_    | Bovine trypsin                       | 1K9B_A    | Bowman-Birk inhibitor          | 1.14       | 1408                          | 2                       |
| 1DFJ_E:I                | E    | 9RSA_B   | Ribonuclease A                       | 2BNH_     | Rnase inhibitor                | 1.02       | 2582                          | 2                       |
| 1E6E_A:B                | E    | 1E1N_A   | Adrenoxin reductase                  | 1CJE_D    | Adrenoxin                      | 1.33       | 2315                          | 2                       |

|              |   |         |                                      |            |                                   |      |      |   |
|--------------|---|---------|--------------------------------------|------------|-----------------------------------|------|------|---|
| 1EAW_A:B     | E | 1EAX_A  | Matriptase                           | 9PTI_      | BPTI                              | 0.54 | 1866 | 2 |
| 1EWY_A:C     | E | 1GJR_A  | Ferredoxin reductase                 | 1CZP_A     | Ferredoxin                        | 0.8  | 1502 | 2 |
| 1EZU_C:AB *  | E | 1TRM_A  | D102N Trypsin                        | 1ECZ_AB    | Ecotin                            | 1.21 | 2751 | 2 |
| 1F34_A:B     | E | 4PEP_   | Porcine pepsin                       | 1F32_A     | Ascaris inhibitor 3               | 0.93 | 3038 | 2 |
| 1FLE_E:I     | E | 9EST_A  | Elastase                             | 2REL_A(4)  | Elafin                            | 1.02 | 1763 | 4 |
| 1GL1_A:I     | E | 1K2I_1  | $\alpha$ -chymotrypsin               | 1PMC_A(6)  | Protease inhibitor LCMI II        | 1.21 | 1591 | 4 |
| 1GXD_A:C     | E | 1CK7_A  | proMMP2 type IV collagenase          | 1BR9_A     | Metalloproteinase inhibitor 2     | 1.39 | 2445 | 4 |
| 1HTA_AB:I    | E | 2PKA_XY | Kallikrein                           | 1BX8_      | Hirustatin                        | 1.4  | 1737 | 2 |
| 1JTG_B:A     | E | 3GMU_B  | $\beta$ -lactamase inhibitor protein | 1ZG4_A     | $\beta$ -lactamase TEM-1          | 0.49 | 2600 | 4 |
| 1MAH_A:F     | E | 1J06_B  | Acetylcholinesterase                 | 1FSC_      | Fasciculin                        | 0.61 | 2145 | 2 |
| 1N80_ABC:E * | E | 8GCH_A  | Chymotrypsin                         | 1IFG_A     | Ecotin                            | 0.94 | 1851 | 3 |
| 1OC0_A:B     | E | 1B3K_A  | Plasminogen activator inhibitor-1    | 2JQ8_A(4)  | Vitronectin Somatomedin B domain  | 1    | 1313 | 4 |
| 1OPH_A:B     | E | 1Q1P_A  | $\alpha$ -1-antitrypsin              | 1UTQ_A     | Trypsinogen                       | 1.21 | 1360 | 3 |
| 1OYV_B:I     | E | 1SCD_A  | Subtilisin Carlsberg                 | 1PJU_A     | Two-headed tomato inhibitor-II    | 0.5  | 1280 | 4 |
| 1OYV_A:I     | E | 1SCD_A  | Subtilisin Carlsberg                 | 1PJU_A     | Two-headed tomato inhibitor-II    | 0.7  | 1930 | 4 |
| 1PPE_E:I     | E | 1BTP_   | Bovine trypsin                       | 1LU0_A     | CMTI-1 squash inhibitor           | 0.44 | 1688 | 2 |
| 1ROR_E:I     | E | 1SCN_E  | Subtilisin carlsberg                 | 2GKR_I     | OMTKY                             | 0.45 | 1409 | 3 |
| 1TMQ_A:B     | E | 1JAE_   | alpha-amylase                        | 1B1U_A     | RAGI inhibitor                    | 0.86 | 2401 | 2 |
| 1UDI_E:I     | E | 1UDH_   | Uracyl-DNA glycosylase               | 2UGI_B     | Glycosylase inhibitor             | 0.9  | 2022 | 2 |
| 1YVB_A:I     | E | 2GHU_A  | Falcipain 2                          | 1CEW_I     | Cystatin                          | 0.51 | 1743 | 3 |
| 2ABZ_B:E     | E | 3I1U_A  | Carboxypeptidase A1                  | 1ZFI_A(1)  | Leech carboxypeptidase inhibitor  | 0.9  | 1443 | 4 |
| 2B42_A:B     | E | 2DCY_A  | Xylanase                             | 1T6E_X     | Xylanase inhibitor                | 0.72 | 2520 | 3 |
| 2J0T_A:D     | E | 966C_A  | MMP1 Intersitial collagenase         | 1D2B_A(20) | Metalloproteinase inhibitor 1     | 1.23 | 1477 | 4 |
| 2MTA_HL:A    | E | 2BBK_JM | Methylamine dehydrogenase            | 2RAC_A     | Amicyanin                         | 0.41 | 1461 | 2 |
| 2O8V_A:B     | E | 1SUR_   | PAPS reductase                       | 2TRX_A     | Thioredoxin                       | 1.37 | 1619 | 3 |
| 2OUL_A:B     | E | 3BPF_A  | Falcipain 2                          | 2NNR_A     | Chagasin                          | 0.53 | 1933 | 4 |
| 2PCC_A:B     | E | 1CCP_   | Cyt C peroxidase                     | 1YCC_      | Cytochrome C                      | 0.39 | 1141 | 2 |
| 2SIC_E:I     | E | 1SUP_   | Subtilisin                           | 3SSI_      | Streptomyces subtilisin inhibitor | 0.36 | 1617 | 2 |
| 2SNI_E:I     | E | 1UBN_A  | Subtilisin                           | 2CI2_I     | Chymotrypsin inhibitor 2          | 0.35 | 1628 | 2 |
| 2UUY_A:B     | E | 1HJ9_A  | Trypsin                              | 2UUX_A     | Tryptase inhibitor from tick      | 0.43 | 1280 | 3 |

|            |   |         |                                |           |                                     |      |      |   |
|------------|---|---------|--------------------------------|-----------|-------------------------------------|------|------|---|
| 3SGQ_E:I   | E | 2QA9_E  | Streptogrisin B                | 2OVO_A    | Ovomucoid inhibitor third domain    | 0.39 | 1211 | 4 |
| 7CEI_A:B   | E | 1UNK_D  | Colicin E7 nuclease            | 1M08_B    | Im7 immunity protein                | 0.7  | 1384 | 2 |
| 1A2K_C:AB  | O | 1QG4_A  | Ran GTPase                     | 1OUN_AB   | Nuclear transport factor 2          | 1.11 | 1603 | 2 |
| 1AK4_A:D   | O | 2CPL_   | Cyclophilin                    | 1E6J_P    | HIV capsid                          | 1.33 | 1029 | 2 |
| 1AKJ_AB:DE | O | 2CLR_DE | MHC class 1 HLA-A2             | 1CD8_AB   | T-cell CD8 coreceptor               | 1.14 | 1995 | 2 |
| 1AZS_AB:C  | O | 1AB8_AB | Adenylyl cyclase               | 1AZT_A    | AC activator Gs $\alpha$ complex    | 0.72 | 1911 | 3 |
| 1B6C_A:B   | O | 1D6O_A  | FKBP binding protein           | 1IAS_A    | TGFbeta receptor                    | 1.96 | 1752 | 2 |
| 1BUH_A:B   | O | 1HCL_   | CDK2 kinase                    | 1DKS_A    | Ckshs1                              | 0.75 | 1324 | 2 |
| 1E96_A:B   | O | 1MH1_   | Rac GTPase                     | 1HH8_A    | p67 Phox                            | 0.71 | 1179 | 2 |
| 1EFN_B:A   | O | 1AVV_A  | HIV-1-NEF protein              | 1G83_A    | SH3 domain                          | 0.77 | 1254 | 3 |
| 1F51_AB:E  | O | 1IXM_AB | Sporulation response factor B  | 1SRR_C    | Sporulation response factor F       | 0.74 | 2407 | 2 |
| 1FC2_C:D   | O | 1BDD_   | Staphylococcus Protein A       | 1FC1_AB   | Human Fc fragment                   | 1.69 | 1307 | 2 |
| 1FCC_AB:C  | O | 1FC1_AB | Fc domain of IgG1 MO61         | 2IGG_A(3) | Strep. protein G C2 fragment        | 0.93 | 1354 | 4 |
| 1FFW_A:B   | O | 3CHY_A  | Chemotaxis protein CheY        | 1FWP_A    | Chemotaxis protein CheA             | 1.43 | 1166 | 4 |
| 1FQJ_A:B   | O | 1TND_C  | Gt-alpha                       | 1FQI_A    | RGS9                                | 0.91 | 1806 | 2 |
| 1GCQ_B:C   | O | 1GRI_B  | GRB2 C-ter SH3 domain          | 1GCP_B    | GRB2 N-ter SH3 domain               | 0.92 | 1208 | 2 |
| 1GHQ_A:B   | O | 1C3D_   | Complement C3                  | 1LY2_A    | Epstein-Barr virus receptor CR2     | 0.34 | 800  | 2 |
| 1GLA_G:F   | O | 1BU6_0  | Glycerol Kinase                | 1F3Z_A    | Glucose specific phosphocarrier     | 0.98 | 1304 | 3 |
| 1GPW_A:B   | O | 1THF_D  | HISF protein                   | 1K9V_F    | Amidotransferase HISH               | 0.65 | 2097 | 3 |
| 1H9D_A:B   | O | 1EAN_A  | Runx1 domain of CBF $\alpha$ 1 | 1ILF_A(1) | Dimerisation domain of CBF- $\beta$ | 1.32 | 2121 | 4 |
| 1HCF_AB:X  | O | 1B98_AM | Neurotrophin-4                 | 1WWB_X    | TrkB-d5 growth factor receptor      | 0.88 | 2136 | 4 |
| 1HE1_C:A   | O | 1MH1_   | Rac GTPase                     | 1HE9_A    | Pseudomonas toxin GAP dom.          | 0.93 | 2113 | 2 |
| 1I4D_D:AB  | O | 1MH1_   | Rac GTPase                     | 1I49_AB   | Arfaptin                            | 1.41 | 1657 | 2 |
| 1J2J_A:B   | O | 1O3Y_A  | Arf1 GTPase                    | 1OXZ_A    | GAT domain of GGA1                  | 0.63 | 1209 | 3 |
| 1JWH_CD:A  | O | 3EED_AB | Casein kinase II $\beta$ chain | 3C13_A    | Casein kinase II $\alpha$ chain     | 1.27 | 1452 | 4 |
| 1K74_AB:DE | O | 1MZN_AB | RXR- $\alpha$                  | 1ZGY_AB   | PPAR-gamma                          | 0.8  | 2200 | 3 |
| 1KAC_A:B   | O | 1NOB_F  | Adenovirus fiber knob protein  | 1F5W_B    | Adenovirus receptor                 | 0.95 | 1456 | 2 |
| 1KLU_AB:D  | O | 1H15_AB | MHC class 2 HLA-DR1            | 1STE_     | Staphylococcus enterotoxin C3       | 0.43 | 1254 | 2 |
| 1KTZ_A:B   | O | 1TGK_   | TGF- $\beta$                   | 1M9Z_A    | TGF- $\beta$ receptor               | 0.39 | 989  | 2 |
| 1KXP_A:D   | O | 1IJJ_B  | Actin                          | 1KW2_B    | Vitamin D binding protein           | 1.12 | 3341 | 2 |

|             |   |           |                                                 |            |                                                      |      |      |   |
|-------------|---|-----------|-------------------------------------------------|------------|------------------------------------------------------|------|------|---|
| 1ML0_AB:D   | O | 1MKF_AB   | Viral chemokine binding p. M3                   | 1DOL_      | Chemokine Mcp1                                       | 1.02 | 2069 | 2 |
| 1OFU_XY:A   | O | 1OFT_AB   | SulA (PA3008)                                   | 2VAW_A     | Cell division protein FtsZ                           | 1.1  | 1583 | 4 |
| 1PVH_A:B    | O | 1BQU_A    | IL6 receptor $\beta$ chain D2-D3 domains        | 1EMR_A     | Leukemia inhibitory factor                           | 0.34 | 1403 | 4 |
| 1QA9_A:B    | O | 1HNF_     | CD2                                             | 1CCZ_A     | CD58                                                 | 0.73 | 1353 | 2 |
| 1RLB_ABCD:E | O | 2PAB_ABCD | Transthyretin                                   | 1HBP_      | Retinol binding protein                              | 0.66 | 1439 | 2 |
| 1RV6_VW:X   | O | 1FZV_AB   | PIGF receptor binding domain                    | 1QSZ_A     | Flt1 protein domain 2                                | 1.09 | 1626 | 4 |
| 1S1Q_A:B    | O | 2F0R_A    | UEV domain                                      | 1YJ1_A     | Ubiquitin                                            | 0.98 | 1288 | 3 |
| 1SBB_A:B    | O | 1BEC_     | T-cell receptor $\beta$                         | 1SE4_      | Staphylococcus enterotoxin B                         | 0.37 | 1064 | 2 |
| 1T6B_X:Y    | O | 1ACC_     | Anthrax protective antigen                      | 1SHU_X     | Anthrax toxin receptor                               | 0.62 | 1948 | 3 |
| 1US7_A:B    | O | 2FXS_A    | Heat shock protein 82 N-ter domain              | 2W0G_A     | HSP 90 co-chaperone CDC37 C-ter domain               | 1.06 | 1095 | 4 |
| 1WDW_BD:A   | O | 1V8Z_AB   | Tryptophan synthase $\beta$ chain 1             | 1GEQ_A     | Tryptophan synthase $\alpha$ chain                   | 1.29 | 3148 | 4 |
| 1XD3_A:B    | O | 1UCH      | UCH-L3                                          | 1YJ1_A     | Ubiquitin                                            | 1.24 | 2281 | 3 |
| 1XU1_ABD:T  | O | 1U5Y_ABD  | TNF domain of APRIL                             | 1XUT_A(11) | TNF receptor superfamily member 13B TACI CRD2 domain | 1.3  | 1697 | 4 |
| 1Z0K_A:B    | O | 2BME_A    | Rab4A GTPase                                    | 1YZM_A     | RAB4 binding domain of Rabenosyn                     | 0.53 | 1787 | 3 |
| 1Z5Y_D:E    | O | 1L6P      | N-term of DsbD                                  | 2B1K_A     | E.coli CCMG protein                                  | 1.23 | 1346 | 3 |
| 1ZHH_A:B    | O | 1JX6_A    | Autoinducer 2-binding periplasmic protein LuxP  | 2HJE_A     | Autoinducer 2 sensor kinase/phosphatase LuxQ         | 1.31 | 2189 | 4 |
| 1ZHI_A:B    | O | 1M4Z_A    | BAH domain of Orc1                              | 1Z1A_A     | Sir Orc-interaction domain                           | 0.68 | 1322 | 3 |
| 2A5T_A:B    | O | 1Y20_A    | NMDA receptor R1-4A subunit ligand-binding core | 2A5S_A     | NMDA receptor R2A subunit ligand-binding core        | 1.28 | 1892 | 4 |
| 2A9K_A:B    | O | 1u90_A    | Ras-related protein Ral-A                       | 2C8B_X     | Mono-ADP-ribosyltransferase C3                       | 0.85 | 1751 | 4 |
| 2AJF_A:E    | O | 1R42_A    | ACE2                                            | 2GHV_E     | SARS spike protein receptor binding domain           | 0.65 | 1704 | 3 |
| 2B4J_AB:C   | O | 1BIZ_AB   | Integrase (HIV-1)                               | 1Z9E_A(1)  | PC4 and SFRS1 interacting protein                    | 0.99 | 1273 | 4 |
| 2BTF_A:P    | O | 1IJJ_B    | Actin                                           | 1PNE_      | Profilin                                             | 0.75 | 2063 | 2 |
| 2FJU_B:A    | O | 2ZKM_X    | Phospholipase $\beta$ 2                         | 1MH1_A     | Rac GTPase                                           | 1.04 | 1245 | 4 |
| 2G77_A:B    | O | 1FKM_A    | GTPase-activating protein GYP1                  | 1Z06_A     | Ras-related protein Rab-33B                          | 1.75 | 2524 | 4 |
| 2HLE_A:B    | O | 2BBA_A    | Ephrin B4 receptor                              | 1IKO_P     | Ephrin B2 ectodomain                                 | 1.4  | 2116 | 3 |
| 2HQ5_A:H    | O | 1CRZ_A    | TolB                                            | 1OAP_A     | Pal                                                  | 1.14 | 2333 | 3 |

|                              |   |           |                                                 |              |                                               |           |      |      |   |
|------------------------------|---|-----------|-------------------------------------------------|--------------|-----------------------------------------------|-----------|------|------|---|
| 2O0B_A:B                     | O | 2O0A_A    | Ubiquitin ligase                                | 1YJ1_A       | Ubiquitin                                     | 0.85      | 808  | 3    |   |
| 2O0R_AB:C                    | O | 1L7E_AB   | NAD(P) transhydrogenase subunit $\alpha$ part 1 | 1E3T_A       | NAD(P) transhydrogenase subunit beta          | 1.42      | 2065 | 4    |   |
| 2VDB_A:B                     | O | 3CX9_A    | Serum albumin                                   | 2J5Y_A       | Peptostreptococcal albumin-binding protein    | 0.47      | 1798 | 4    |   |
| 3BP8_AB:C                    | O | 1Z6R_AB   | Mlc transcription regulator                     | 3BP3_A       | PTS glucose-specific enzyme EIICB             | 0.45      | 1391 | 4    |   |
| 3D5S_A:C                     | O | 1C3D_A    | Complement C3d fragment                         | 2GOM_A       | Fibrinogen-binding protein C-ter domain       | 0.56      | 1620 | 4    |   |
| <b>Medium Dfficulty (30)</b> |   |           |                                                 |              |                                               |           |      |      |   |
| 1BGX_HL:T                    | A | 1AY1_HL   | Fab                                             | 1CMW_A       | Taq polymerase                                | 1.48      | 5814 | 2    |   |
| 1ACB_E:I                     | E | 2CGA_B    | Chymotrypsin                                    | 1EGL_        | Eglin C                                       | 2.26      | 1544 | 2    |   |
| 1IJK_A:BC                    | E | 1AUQ_     | Von Willebrand Factor dom. A1                   | 1FVU_AB      | Botrocetin                                    | 0.68      | 1648 | 2    |   |
| 1JIW_P:I                     | E | 1AKL_A    | Alkaline metalloproteinase                      | 2RN4_A(1)    | Proteinase inhibitor                          | 2.07      | 1997 | 4    |   |
| 1KKL_ABC:H                   | E | 1JB1_ABC  | HPr kinase C-ter domain                         | 2HPR_        | HPr                                           | 2.2       | 1641 | 2    |   |
| 1M10_A:B                     | E | 1AUQ_     | Von willebrand factor dom. A1                   | 1M0Z_B       | Glycoprotein IB- $\alpha$                     | 2.1       | 2097 | 2    |   |
| 1NW9_B:A                     | E | 1JXQ_A    | Capase-9                                        | 1IFG_A       | Ecotin                                        | 1.97      | 2112 | 3    |   |
| 4CPA_A:I                     | E | 8CPA_A    | Carboxypeptidase A                              | 1H20_A(9)    | Potato carboxypeptidase inhibitor             | 1.97      | 1175 | 4    |   |
| 1GP2_A:BG                    | O | 1GIA_     | Gi- $\alpha$                                    | 1TBG_DH      | Gi- $\beta, \gamma$                           | 1.65      | 2287 | 2    |   |
| 1GRN_A:B                     | * | O         | 1A4R_A                                          | CDC42 GTPase | 1RGP_                                         | CDC42 GAP | 1.22 | 2332 | 2 |
| 1HE8_B:A                     | O | 821P_     | Ras GTPase                                      | 1E8Z_A       | PIP3 kinase                                   | 0.92      | 1305 | 2    |   |
| 1I2M_A:B                     | O | 1QG4_A    | Ran GTPase                                      | 1A12_A       | RCC1                                          | 2.12      | 2779 | 2    |   |
| 1IB1_AB:E                    | O | 1QJB_AB   | 14-3-3 protein                                  | 1KUY_A       | Serotonin N-acteylase                         | 2.09      | 2808 | 2    |   |
| 1K5D_AB:C                    | O | 1RRP_AB   | Ran GTPase                                      | 1YRG_B       | Ran GAP                                       | 1.19      | 2527 | 2    |   |
| 1LFD_B:A                     | O | 5P21_A    | Ras                                             | 1LXD_A       | RalGDS Ras-interacting domain                 | 1.79      | 1167 | 4    |   |
| 1MQ8_A:B                     | O | 1IAM_A    | ICAM-1 domain 1-2                               | 1MQ9_A       | Integrin $\alpha$ -L I domain                 | 1.76      | 1253 | 4    |   |
| 1N2C_ABCD:EF                 | O | 3MIN_ABCD | Nitrogenase Mo-Fe protein                       | 2NIP_AB      | Nitrogenase Fe protein                        | 2.13      | 3635 | 2    |   |
| 1R6Q_A:C                     | O | 1R6C_X    | Clp protease subunit ClpA                       | 2W9R_A       | Clp protease adaptor protein ClpS             | 1.67      | 1651 | 4    |   |
| 1SYX_A:B                     | O | 1QGV_A    | Spliceosomal U5 15 kDa protein                  | 1L2Z_A(1)    | CD2 receptor binding protein 2 C-ter fragment | 1.64      | 1293 | 4    |   |
| 1WQ1_R:G                     | * | O         | 6Q21_D                                          | Ras GTPase   | 1WER_                                         | Ras GAP   | 1.16 | 2913 | 2 |
| 1XQS_A:C                     | O | 1XQR_A    | HspBP1                                          | 1S3X_A       | Hsp70 ATPase domain                           | 1.77      | 2350 | 3    |   |
| 2AYO_A:B                     | O | 2AYN_A    | Ubiquitin carboxyl-terminal hydrolase 14        | 2FCN_A       | Ubiquitin                                     | 1.62      | 3027 | 4    |   |
| 2CFH_A:C                     | O | 1S27_A    | BET3                                            | 2BJN_A       | TPC6                                          | 1.55      | 2384 | 3    |   |

|                       |    |         |                               |           |                                                      |      |      |   |
|-----------------------|----|---------|-------------------------------|-----------|------------------------------------------------------|------|------|---|
| 2H7V_A:C              | O  | 1MH1_   | Rac GTPase                    | 2H7O_A    | YpkA                                                 | 1.63 | 1574 | 3 |
| 2HRK_A:B              | O  | 2HRA_A  | Glutamyl-t-RNA synthetase     | 2HQT_A    | GU-4 nucleic binding protein                         | 2.03 | 1595 | 3 |
| 2J7P_A:D              | O  | 1NG1_A  | SRP GTPase Ffh                | 2IYL_D    | Cell division protein FtsY                           | 1.93 | 3008 | 4 |
| 2NZ8_A:B              | O  | 1MH1_   | Rac GTPase                    | 1NTY_A    | DH/PH domain of TRIO                                 | 2.13 | 2599 | 3 |
| 2OZA_B:A              | O  | 3HEC_A  | MAP kinase 14                 | 3FYK_X    | MAP kinase-activated protein kinase 2                | 1.89 | 6248 | 4 |
| 2Z0E_A:B              | O  | 2D1I_A  | Cysteine protease Atg4B       | 1V49_A(1) | Microtubule-associated proteins 1A/1B light chain 3B | 2.15 | 2478 | 4 |
| 3CPH_G:A              | O  | 3CPI_G  | Ras-related protein Sec4      | 1G16_A    | Rab GDP-dissociation inhibitor                       | 2.12 | 1685 | 4 |
| <b>Difficult (25)</b> |    |         |                               |           |                                                      |      |      |   |
| 1E4K_AB:C             | A  | 2DTQ_AB | FC fragment of human IgG 1    | 1FNL_A    | Human FCGR III                                       | 2.59 | 1634 | 3 |
| 2HMI_CD:AB            | AB | 2HMI_CD | Fab 28                        | 1S6P_AB   | HIV1 reverse transcriptase                           | 2.26 | 1234 | 2 |
| 1F6M_A:C              | E  | 1CL0_A  | Thioredoxin reductase         | 2TIR_A    | Thioredoxin 1                                        | 4.9  | 1821 | 4 |
| 1FQ1_A:B              | E  | 1B39_A  | CDK2 kinase                   | 1FPZ_F    | CDK inhibitor 3                                      | 3.41 | 1832 | 2 |
| 1PXV_A:C              | E  | 1X9Y_A  | Cystein protease              | 1NYC_A    | Cystein protease inhibitor                           | 2.63 | 2336 | 3 |
| 1ZLI_A:B              | E  | 1KWM_A  | Carboxypeptidase B            | 2JTO_A(6) | Tick carboxypeptidase inhibitor                      | 2.53 | 2084 | 4 |
| 2O3B_A:B              | E  | 1ZM8_A  | NucA nuclease                 | 1J57_A    | NuiA nuclease inhibitor                              | 3.13 | 1675 | 4 |
| 1ATN_A:D              | O  | 1IJJ_B  | Actin                         | 3DNI_     | Dnase I                                              | 3.28 | 1774 | 2 |
| 1BKD_R:S              | O  | 1CTQ_A  | Ras GTPase                    | 2IIO_B    | Son of sevenless                                     | 2.86 | 3163 | 3 |
| 1DE4_AB:CF            | O  | 1A6Z_AB | $\beta$ 2-microglobulin       | 1CX8_AB   | Transferrin receptor ectodom.                        | 2.59 | 2066 | 2 |
| 1EER_A:BC             | O  | 1BUY_A  | Erythropoietin                | 1ERN_AB   | EPO receptor                                         | 2.44 | 3347 | 2 |
| 1FAK_HL:T             | O  | 1QFK_HL | Coagulation factor VIIa       | 1TFH_B    | Soluble tissue factor                                | 6.18 | 3363 | 2 |
| 1H1V_A:G              | O  | 1IJJ_B  | Actin                         | 1D0N_B    | Gelsolin                                             | 6.62 | 2071 | 2 |
| 1IBR_A:B              | O  | 1QG4_A  | Ran GTPase                    | 1F59_A    | Importin beta                                        | 2.54 | 2270 | 2 |
| 1IRA_Y:X              | O  | 1G0Y_R  | Interleukin-1 receptor        | 1ILR_1    | Interleukin-1 receptor antagonist protein            | 8.38 | 3367 | 3 |
| 1JK9_B:A              | O  | 1QUP_A  | CCS metallochaperone          | 2JCW_A    | SOD1 superoxide dismutase                            | 4.87 | 2130 | 4 |
| 1JMO_A:HL             | O  | 1JMJ_A  | Heparin cofactor              | 2CN0_HL   | Thrombin                                             | 3.21 | 3461 | 3 |
| 1JZD_AB:C             | O  | 1JZO_AB | DsbC disulfide bond isomerase | 1JPE_A    | DsbD disulfide bond isomerase                        | 2.71 | 2026 | 4 |
| 1R8S_A:E              | O  | 1HUR_A  | Arf1 GTPase                   | 1R8M_E    | Sec 7 domain                                         | 3.73 | 2986 | 3 |
| 1Y64_A:B              | O  | 2FXU_A  | Actin                         | 1UX5_A    | BN11 protein                                         | 4.69 | 2745 | 3 |
| 1ZM4_A:B              | O  | 1NOV_C  | Elongation factor 2           | 1XK9_A    | Diphtheria toxin A catalytic domain                  | 2.94 | 1554 | 4 |
| 2COL_A:B              | O  | 1FCH_A  | PTS1 and TRP region of PEX5   | 1C44_A    | SCP2                                                 | 2.62 | 2013 | 3 |

|          |   |        |                                                  |           |                                      |      |      |   |
|----------|---|--------|--------------------------------------------------|-----------|--------------------------------------|------|------|---|
| 2I9B_E:A | ○ | 1YWH_A | Urokinase plasminogen activator surface receptor | 2I9A_A    | Urokinase-type plasminogen activator | 3.79 | 2371 | 4 |
| 2IDO_A:B | ○ | 1J54_A | DNA polymerase III $\epsilon$ exonuclease domain | 1SE7_A(1) | HOT protein (P1 phage)               | 2.79 | 1953 | 4 |
| 2OT3_B:A | ○ | 1YZU_A | Rab21 GTPase                                     | 1TXU_A    | Rabex-5 VPS9 domain                  | 2.79 | 2306 | 3 |

<sup>a</sup> Benchmark version that the case was/is included.
